# Supplementary material for: Brodifacoum Levels and Biomarkers in Coastal Fish Species following a Rodent Eradication in an Italian Marine Protected Area: Preliminary Results
Source: MDPI journal article supplement (doi:10.3390/life13020415), 2023-02-02
Supplement: s1 [file s1]

# **Brodifacoum levels and biomarkers in coastal fish species following a rodent eradication in an Italian Marine Protected Area: preliminary results**

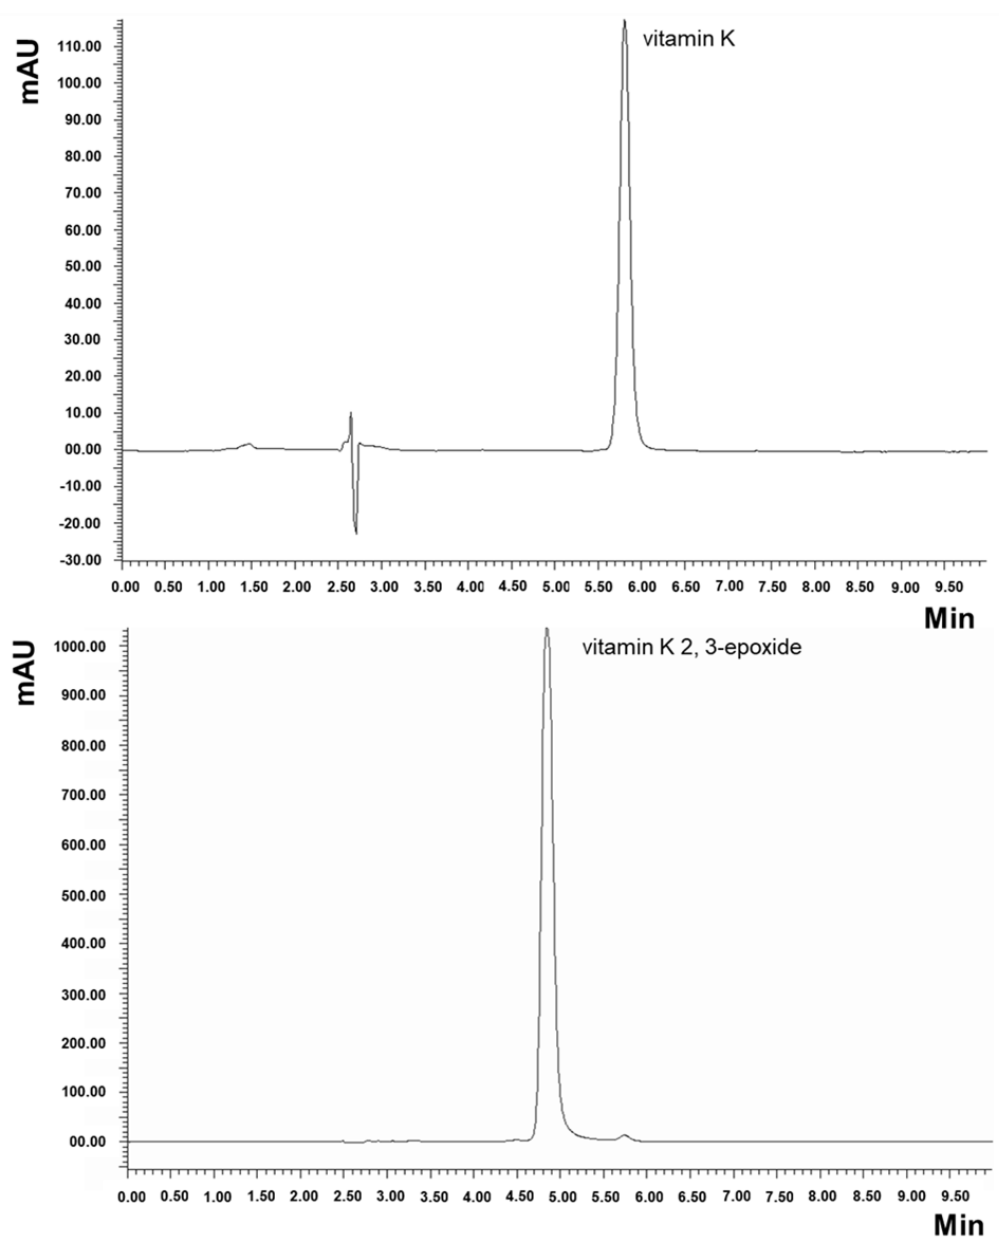

**Figure S1:** HPLC chromatogram showing vitamin K and vitamin K 2,3 epoxide standard solutions.

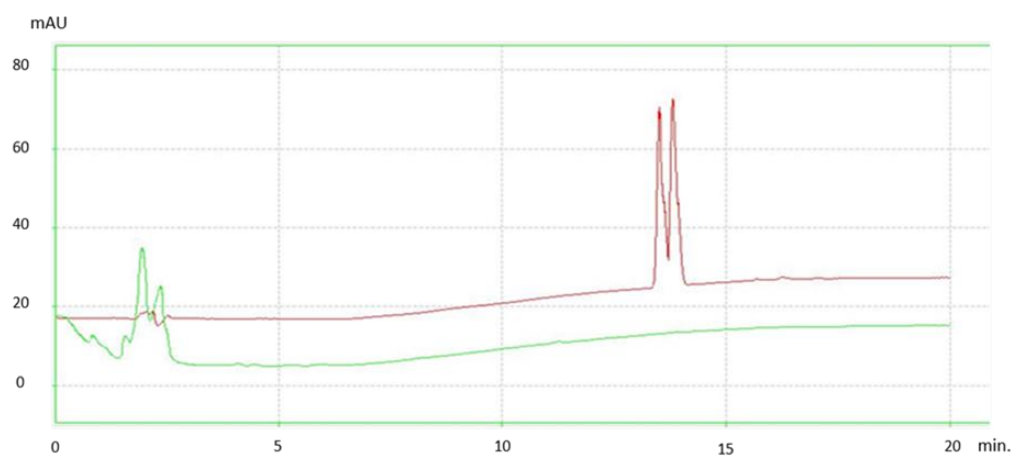

**Figure S2:** HPLC chromatogram obtained by the standard brodifacoum solution (red) and by a sample (green).
